# Supplementary material for: Towards an understanding of phase transitions between inverse bicontinuous cubic lyotropic liquid crystalline phases
Source: Royal Society of Chemistry journal article supplement (doi:10.1039/b911699k), 2009-11-02
Supplement: b911699k.pdf [file b911699k.pdf]

## Supplementary Information Figures S1-S5

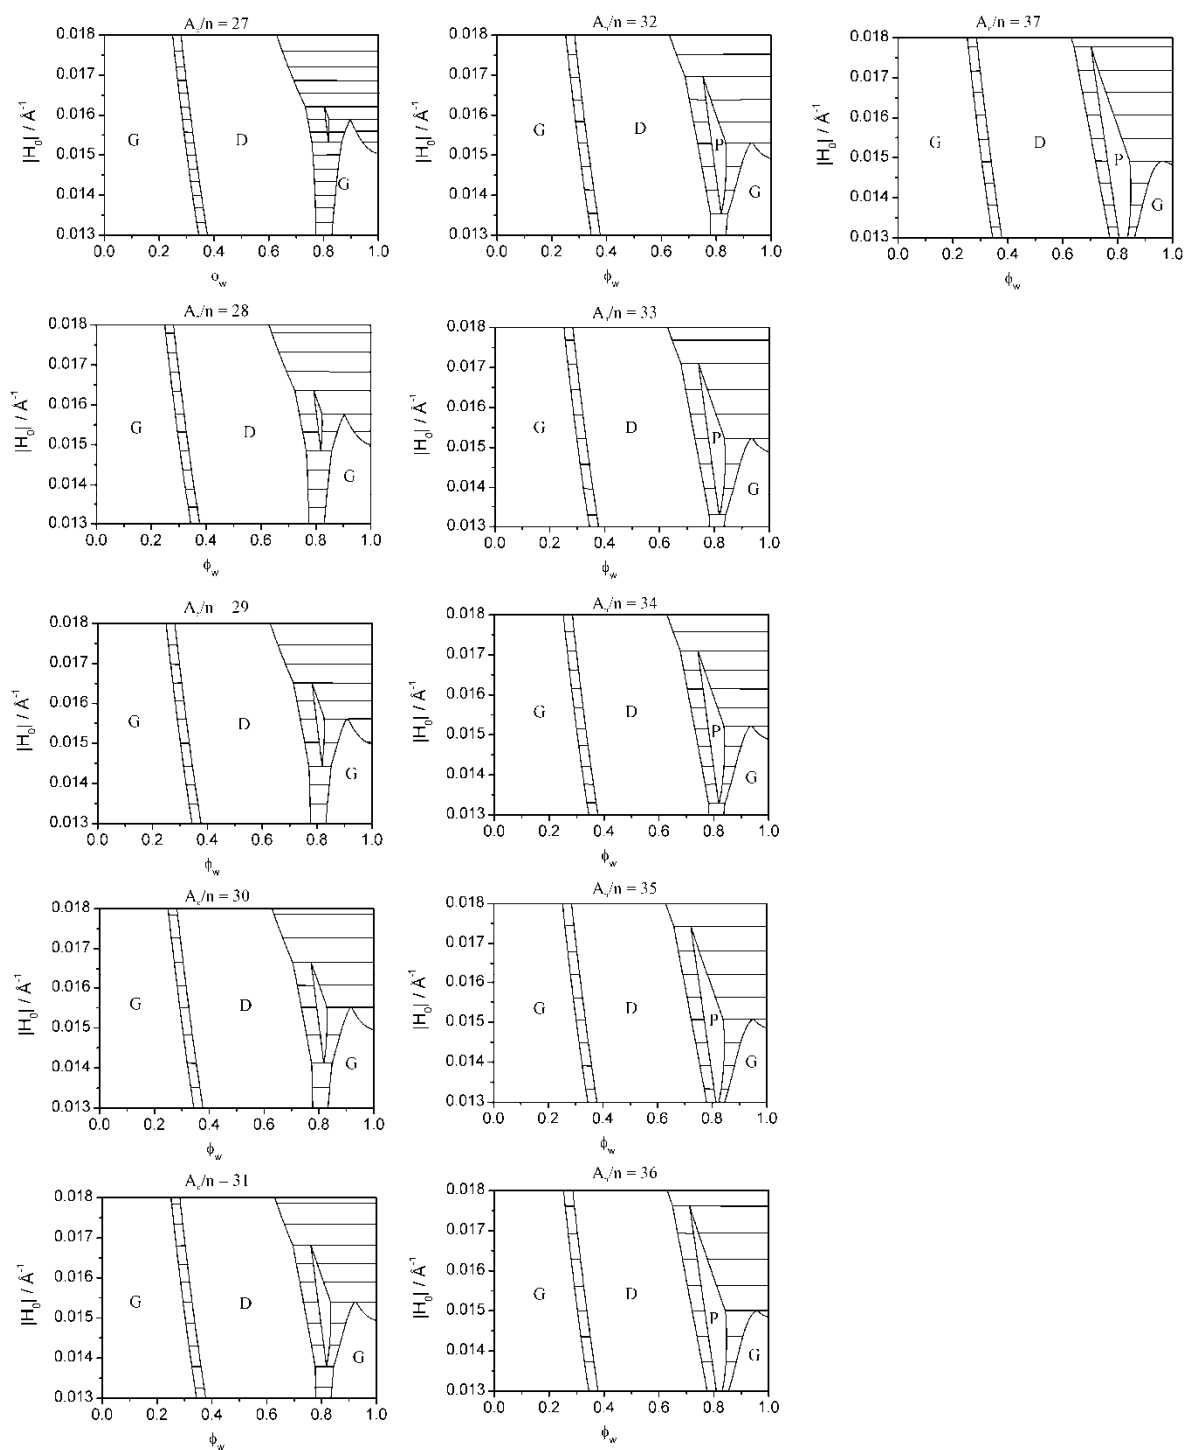

**Figure S1.** Partial theoretical phase diagrams, where the magnitude of  $H_0$  ( $|H_0|$ ) is acting as a first order proxy for temperature, for which  $A_n/v = 0.06 \text{ \AA}^{-1}$ ,  $v_n/v = 0.74$ ,  $\kappa_G/\kappa = -0.75$  and  $\lambda/\kappa = 0.0005 \text{ \AA}^{-2}$ , with  $A_n/n$  varying between  $27 \text{ \AA}^2$  and  $37 \text{ \AA}^2$ .

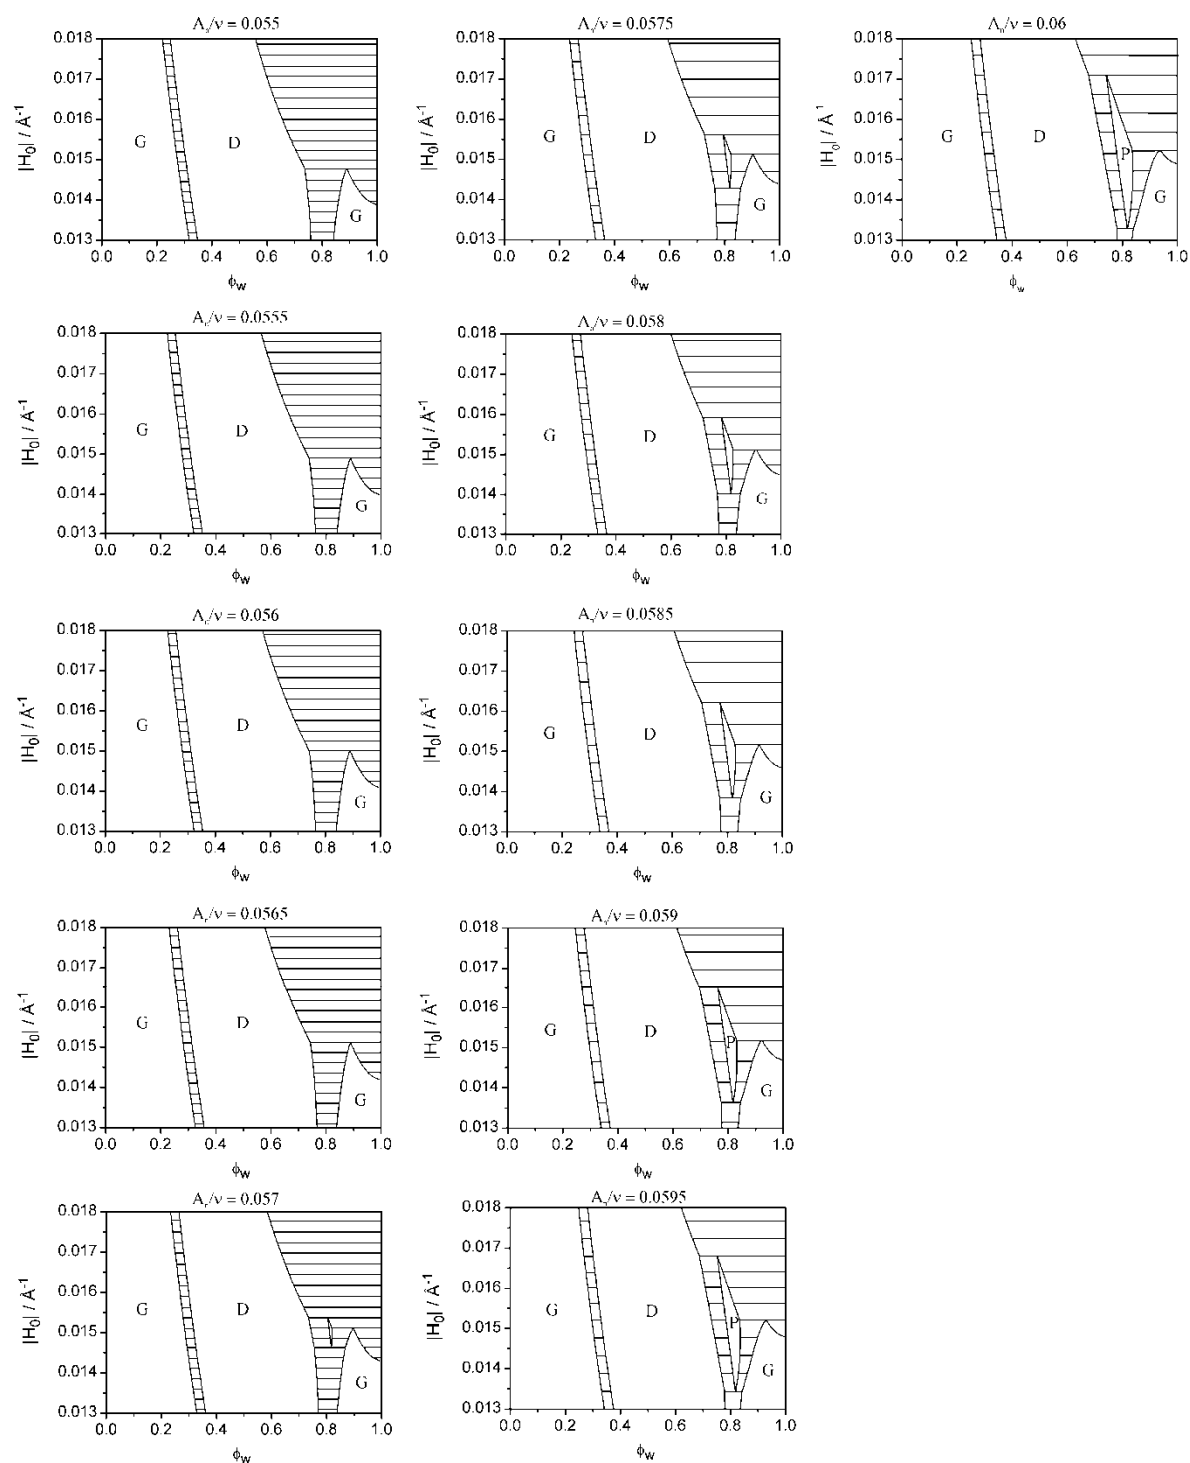

**Figure S2.** Partial theoretical phase diagrams, where  $|H_0|$  is acting as a first order proxy for temperature, for which  $A_n/n = 33 \text{ \AA}^2$ ,  $v_n/v = 0.74$ ,  $\kappa_G/\kappa = -0.75$  and  $\lambda/\kappa = 0.0005 \text{ \AA}^{-2}$ , with  $A_n/v$  varying between  $0.055 \text{ \AA}^{-1}$  and  $0.06 \text{ \AA}^{-1}$ .

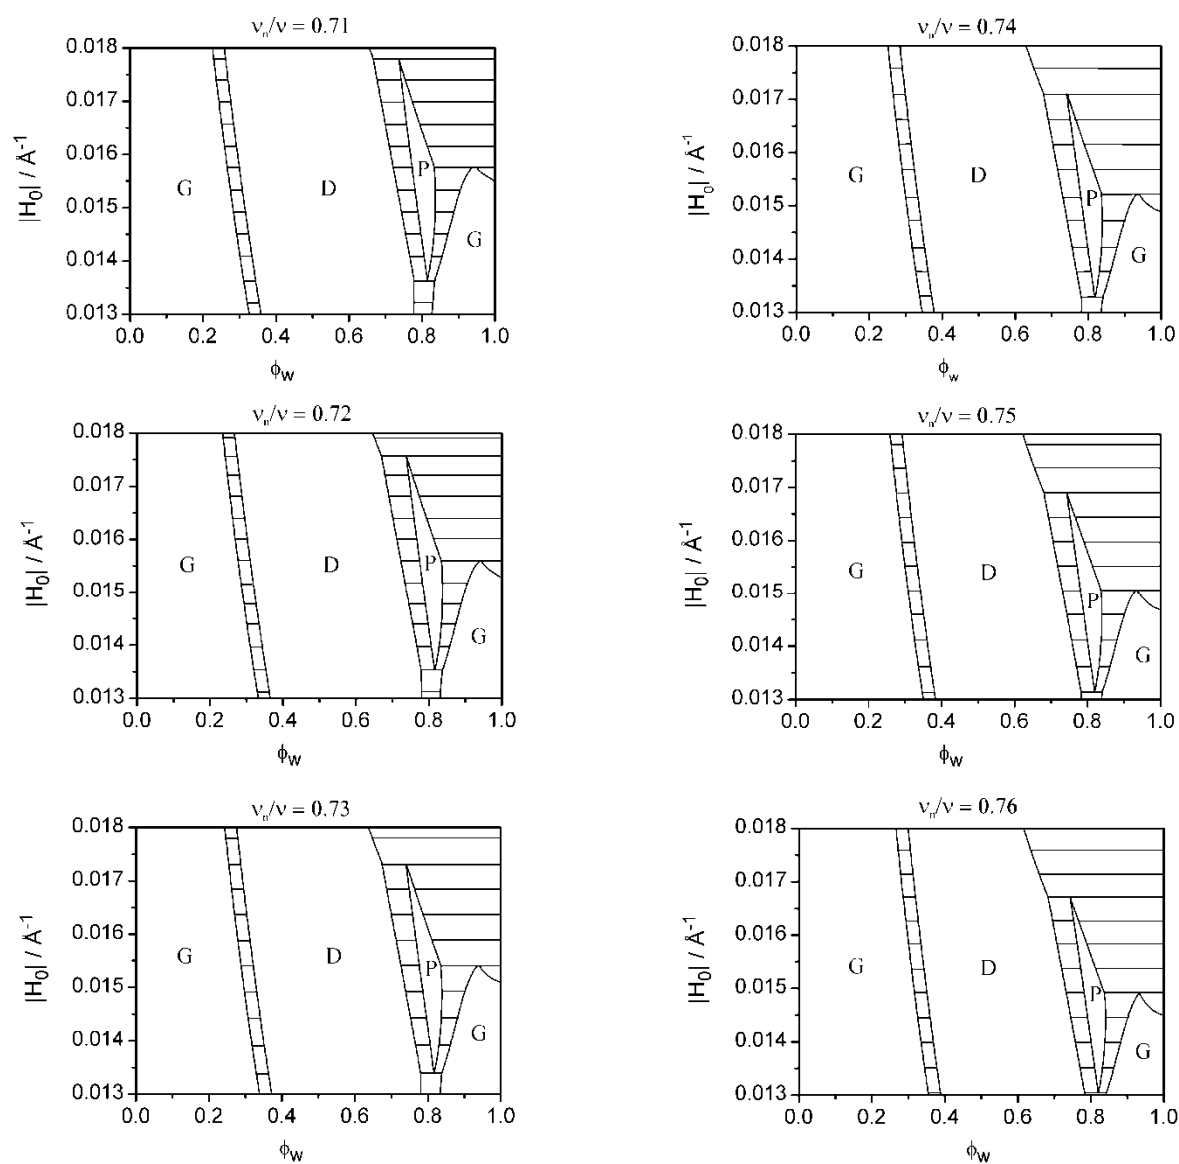

**Figure S3.** Partial theoretical phase diagrams, where  $|H_0|$  is acting as a first order proxy for temperature, for which  $A_n/n = 33 \text{ \AA}^2$ ,  $A_n/v = 0.06 \text{ \AA}^{-1}$ ,  $\kappa_G/\kappa = -0.75$  and  $\lambda/\kappa = 0.0005 \text{ \AA}^{-2}$ , with  $v_n/v$  varying between 0.71 and 0.76.

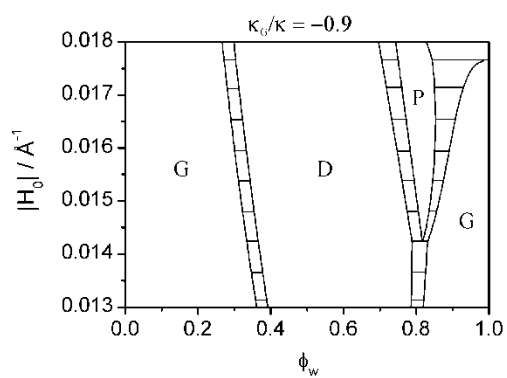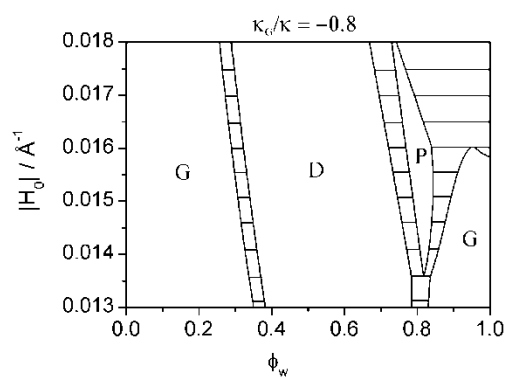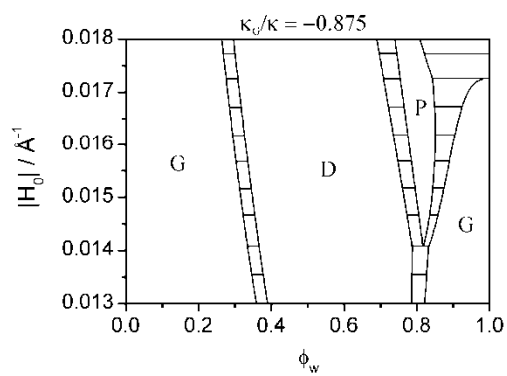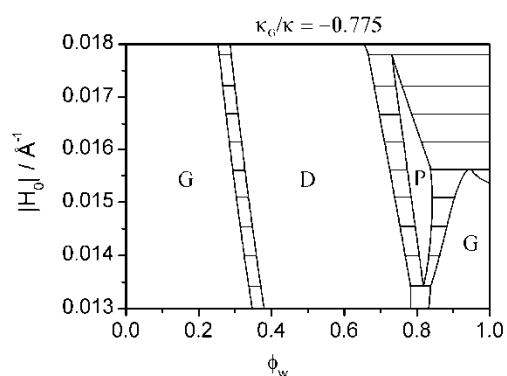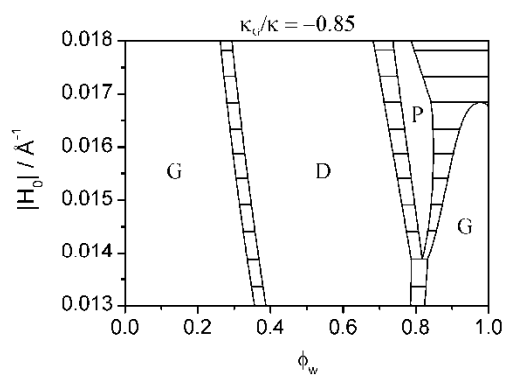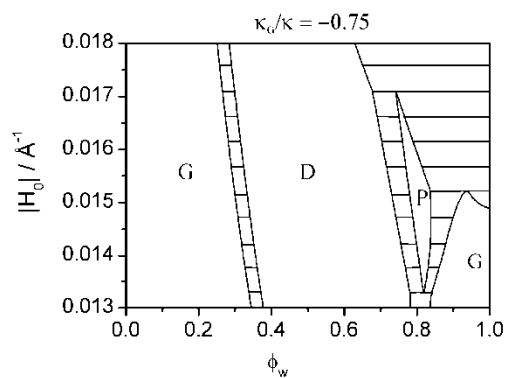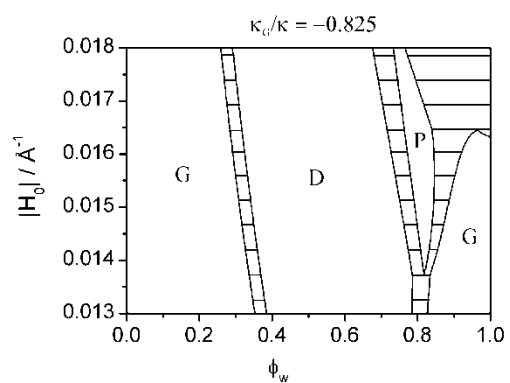

**Figure S4.** Partial theoretical phase diagrams, where  $|H_0|$  is acting as a first order proxy for temperature, for which  $A_n/n = 33 \text{ \AA}^2$ ,  $A_n/v = 0.06 \text{ \AA}^{-1}$ ,  $v_n/v = 0.74$  and  $\lambda/\kappa = 0.0005 \text{ \AA}^{-2}$ , with  $\kappa_G/\kappa$  varying between -0.9 and -0.75.

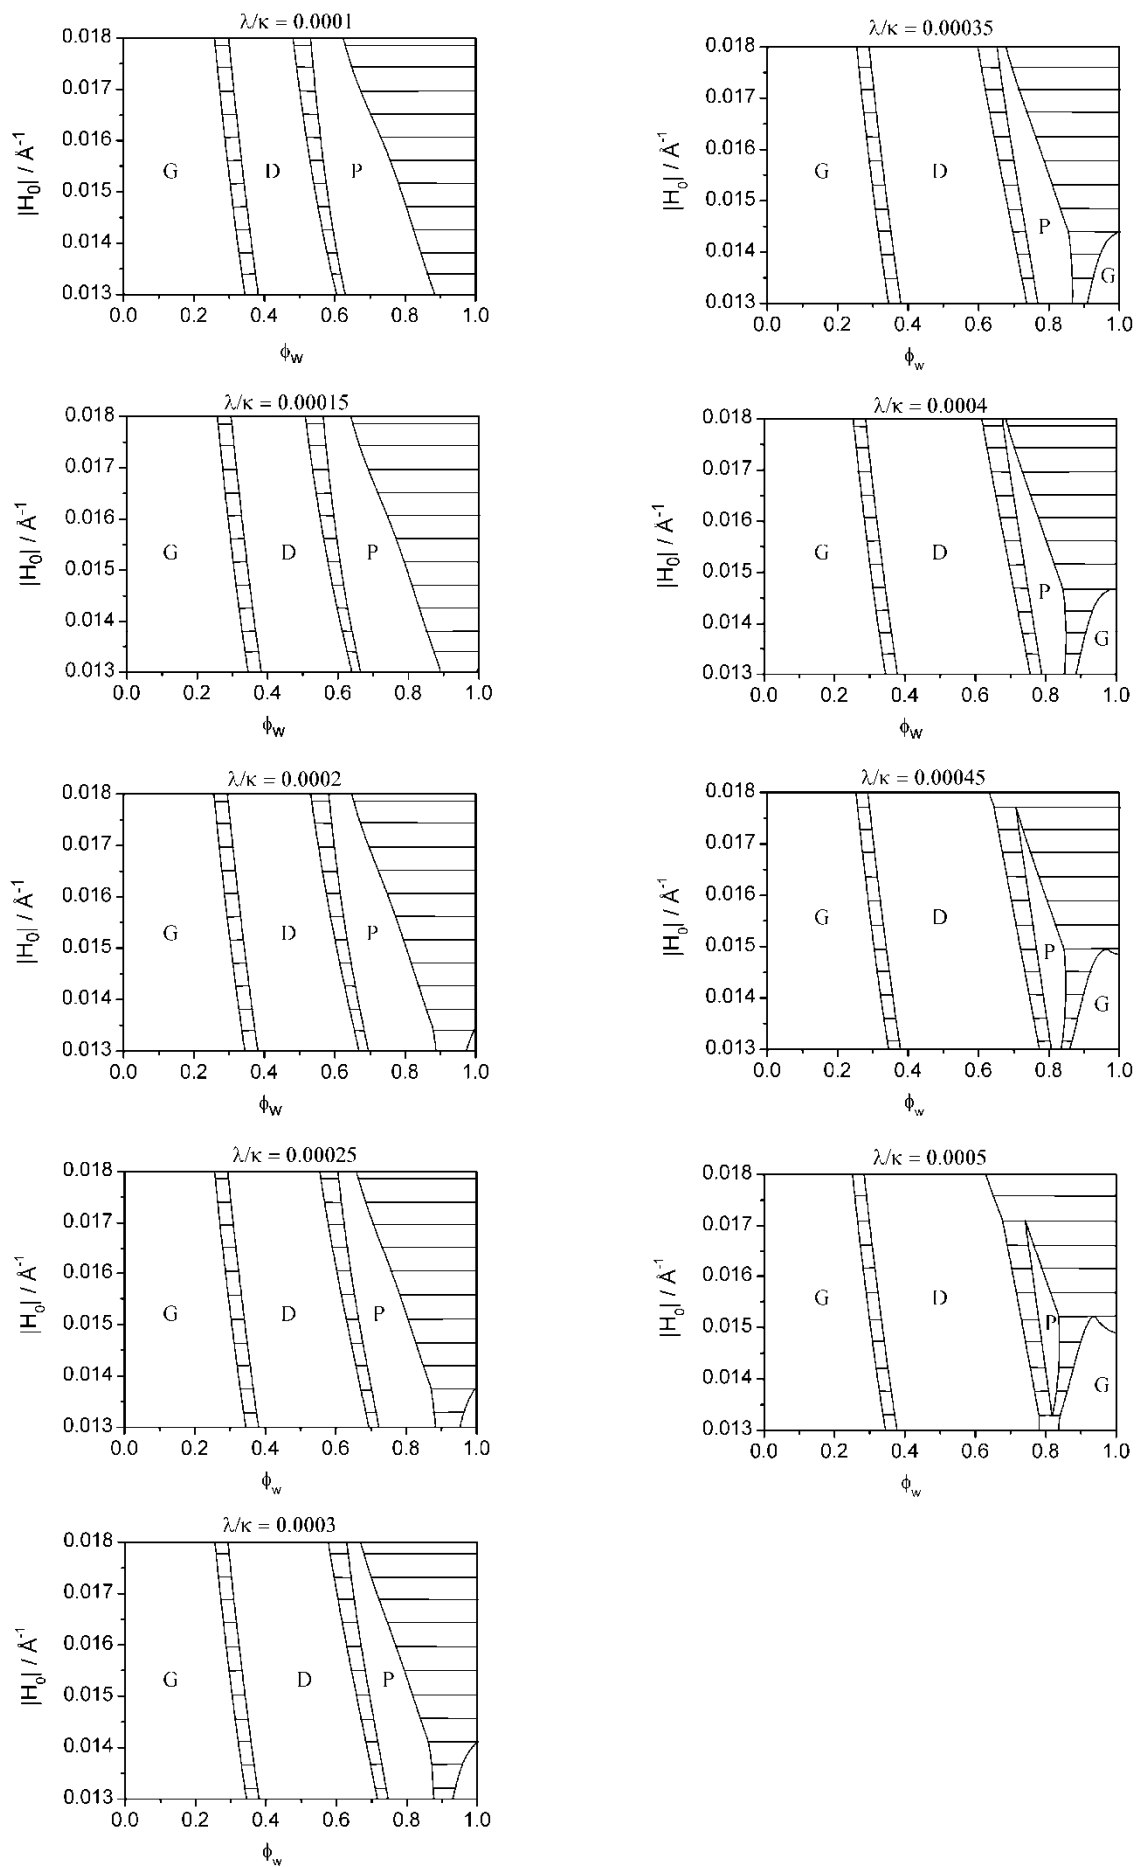

**Figure S5.** Partial theoretical phase diagrams, where  $|H_0|$  is acting as a first order proxy for temperature, for which  $A_n/n = 33 \text{ \AA}^2$ ,  $A_n/\nu = 0.06 \text{ \AA}^{-1}$ ,  $\nu_n/\nu = 0.74$  and  $\kappa_G/\kappa = -0.75$ , with  $\lambda/\kappa$  varying between  $0.0001 \text{ \AA}^{-2}$  and  $0.0005 \text{ \AA}^{-2}$ .

**Mathematica Code:**

Off[General::spell]

Off[General::spell1]

 $\mu c := \text{Apdivn}*(2*(\text{Hp} - \text{H0})^2 + \kappa \text{Gdiv}\kappa*\text{Kn})$  $\Theta := (\text{vpdivv})*(1 - \phi)$  $\text{suma} := (\sigma a*(\Theta)^0) + (\sigma b*(\Theta)^2) + (\sigma c*(\Theta)^4) + (\sigma d*(\Theta)^6)$  $\text{secsum} := (\zeta a*(\Theta^1)) + (\zeta b*(\Theta^3)) + (\zeta c*(\Theta^5)) + (\zeta d*(\Theta^7)) + (\zeta e*(\Theta^9))$  $a := (2/\text{Apdivv})*(1/(1 - \phi))*\text{suma}$  $\text{Hp} := -\text{secsum} / a$  $\text{Sn} := (\text{Apdivv}/2)*((a^3)*(1 - \phi))$  $\text{Kn} := 2*\pi*\chi / \text{Sn}$  $\text{diamond} := 0.000337618(1 - \phi)^2 + 0.0000337858(1 - \phi)^4 - 0.000489167(1 - \phi)^6 + 0.00216436(1 - \phi)^8$  $\text{primitive} := 0.000210286(1 - \phi)^2 + 0.00258955(1 - \phi)^4 - 0.0166996(1 - \phi)^6 + 0.125123(1 - \phi)^8$  $\text{gyroid} := 0.00010488(1 - \phi)^2 + 0.000356135(1 - \phi)^4 - 0.00228924(1 - \phi)^6 + 0.00450621(1 - \phi)^8$  $\text{varprimfapc} := \text{primitive}*a^2 / . \sigma a \rightarrow 2.3451 / . \sigma b \rightarrow -1.1713 / . \sigma c \rightarrow -0.22227 / . \sigma d \rightarrow -2.4952$  $\text{vardiafapc} := \text{diamond}*a^2 / . \sigma a \rightarrow 1.9189 / . \sigma b \rightarrow -0.8893 / . \sigma c \rightarrow -0.061856 / . \sigma d \rightarrow -0.65474$  $\text{vargyrfapc} := \text{gyroid}*a^2 / . \sigma a \rightarrow 3.0915 / . \sigma b \rightarrow -1.3317 / . \sigma c \rightarrow -0.19974 / . \sigma d \rightarrow -0.80113$  $\mu_{fp} := \lambda \text{div}\kappa*\text{varprimfapc}$  $\mu_{fd} := \lambda \text{div}\kappa*\text{vardiafapc}$  $\mu_{fg} := \lambda \text{div}\kappa*\text{vargyrfapc}$  $\text{da} := a / . \sigma a \rightarrow 1.9189 / . \sigma b \rightarrow -0.8893 / . \sigma c \rightarrow -0.061856 / . \sigma d \rightarrow -0.65474 / . \zeta a \rightarrow 1.8379 / . \zeta b \rightarrow -0.17345 / . \zeta c \rightarrow 16.508 / . \zeta d \rightarrow -62.547 / . \zeta e \rightarrow 76.638 / . \chi \rightarrow -2$  $\text{pa} := a / . \sigma a \rightarrow 2.3451 / . \sigma b \rightarrow -1.1713 / . \sigma c \rightarrow -0.22227 / . \sigma d \rightarrow -2.4952 / . \zeta a \rightarrow 3.0458 / . \zeta b \rightarrow -14.256 / . \zeta c \rightarrow 237.3 / . \zeta d \rightarrow -1365.6 / . \zeta e \rightarrow 2719.7 / . \chi \rightarrow -4$  $\text{ga} := a / . \sigma a \rightarrow 3.0915 / . \sigma b \rightarrow -1.3317 / . \sigma c \rightarrow -0.19974 / . \sigma d \rightarrow -0.80113 / . \zeta a \rightarrow 2.7953 / . \zeta b \rightarrow -9.9778 / . \zeta c \rightarrow 59.478 / . \zeta d \rightarrow -111.96 / . \zeta e \rightarrow 74.685 / . \chi \rightarrow -8$  $\text{d}\mu c := \mu c / . \sigma a \rightarrow 1.9189 / . \sigma b \rightarrow -0.8893 / . \sigma c \rightarrow -0.061856 / . \sigma d \rightarrow -0.65474 / . \zeta a \rightarrow 1.8379 / . \zeta b \rightarrow -0.17345 / . \zeta c \rightarrow 16.508 / . \zeta d \rightarrow -62.547 / . \zeta e \rightarrow 76.638 / . \chi \rightarrow -2$  $\text{p}\mu c := \mu c / . \sigma a \rightarrow 2.3451 / . \sigma b \rightarrow -1.1713 / . \sigma c \rightarrow -0.22227 / . \sigma d \rightarrow -2.4952 / . \zeta a \rightarrow 3.0458 / . \zeta b \rightarrow -14.256 / . \zeta c \rightarrow 237.3 / . \zeta d \rightarrow -1365.6 / . \zeta e \rightarrow 2719.7 / . \chi \rightarrow -4$  $\text{g}\mu c := \mu c / . \sigma a \rightarrow 3.0915 / . \sigma b \rightarrow -1.3317 / . \sigma c \rightarrow -0.19974 / . \sigma d \rightarrow -0.80113 / . \zeta a \rightarrow 2.7953 / . \zeta b \rightarrow -9.9778 / . \zeta c \rightarrow 59.478 / . \zeta d \rightarrow -111.96 / . \zeta e \rightarrow 74.685 / . \chi \rightarrow -8$  $\mu_{\text{ptot}} := \mu_{fp} + \text{p}\mu c$  $\mu_{\text{dtot}} := \mu_{fd} + \text{d}\mu c$  $\mu_{\text{gtot}} := \mu_{fg} + \text{g}\mu c$ 

The phase diagram can be determined from free energy graphs by obtaining the common tangent lines between different phases - where the common tangent touches the curve becomes the point at



which the phases mix in each case. In order to determine the common tangent line, one must equate both the gradients and the y-intercepts and then solve the simultaneous equation. The excess water point can be determined by finding the minimum of each of the free energy curves by differentiating and equating to zero (to find a turning point). These can then be compared to each other to find the one which lies at the lowest energy.

Please change the OpenWrite and Import addresses to more suitable ones of your preference.

```
phasematrix = OpenWrite["C:\phasematrix_t", FormatType -> OutputForm];
yphasematrix = OpenWrite["C:\yphasematrix_t", FormatType -> OutputForm, PageWidth -> 200];
```

We need to initialise the starting values first, then increment them as:

*H<sub>0</sub> varies as the spontaneous radius of curvature ratio of 0.2A/K*

*An/n increases 0.17%/K*

*An/v increases 0.09%/K*

*vn/v does not change*

*Kg/K scales as (An/n)<sup>-2.5</sup>*

*lambda/K scales as (An/n)<sup>7.5</sup>*

*Here we have set our initial R<sub>0</sub> value as 35, but this can be changed.*

```
Do[
Clear[phaserec];
gtopsecboundl = 10;
gtodsecboundl = 10;
dtopsecboundl = 10;
dtogsecboundl = 10;
ptodsecboundl = 10;
ptogsecboundl = 10;
Apsdivn = 33 + 33*(0.0017*k);
vpsdiv = 0.76;
Apsdivv = 0.057 + 0.057*(0.0009*k);
κGdivκ = -0.75*((Apsdivn/33)^(-2.5));
λdivκ = 0.00035*((Apsdivn/33)^(7.5));
T = k;
R0 = (35 - 0.2 k);
H0 = -1/2/R0;
diffp = D[μptot, φ];
diffd = D[μdtot, φ];
diffg = D[μgtot, φ];
pmin = FindRoot[diffp == 0, {φ, 0.1}, MaxIterations -> 200];
dmin = FindRoot[diffd == 0, {φ, 0.1}, MaxIterations -> 200];
gmin = FindRoot[diffg == 0, {φ, 0.1}, MaxIterations -> 200];
γμptot = μptot /. φ -> a1;
γμdtot = μdtot /. φ -> b;
γμgtot = μgtot /. φ -> c;
diffpal = diffp /. φ -> a1;
diffdb = diffd /. φ -> b;
diffgc = diffg /. φ -> c;
yintp = γμptot - (diffpal*a1);
yintd = γμdtot - (diffdb*b);
yintg = γμgtot - (diffgc*c);
```

```
record[1] = T;
record[2] =  $\phi$  /. pmin[[1]];
record[3] =  $\phi$  /. dmin[[1]];
record[4] =  $\phi$  /. gmin[[1]];
phaserec[1] = T;
ypmin =  $\mu$ ptot /.  $\phi$  -> record[2];
ydmin =  $\mu$ dtot /.  $\phi$  -> record[3];
ygmin =  $\mu$ gtot /.  $\phi$  -> record[4];
If[ypmin < ydmin && ypmin < ygmin,
phaserec[2] = record[2];
If[record[2] > 0.999,
phaserec[2] = 1]];
If[ydmin < ypmin && ydmin < ygmin,
phaserec[2] = record[3];
If[record[3] > 0.999,
phaserec[2] = 1]];
If[ygmin < ypmin && ygmin < ydmin,
phaserec[2] = record[4];
If[record[4] > 0.999,
phaserec[2] = 1]];
player = Array[record, 4];
t = 1;
n = 0;
Do[
If[ $\mu$ gtot <  $\mu$ dtot, w = 1];
If[ $\mu$ dtot <  $\mu$ gtot, w = 3];
If[t  $\neq$  w && t == 1 && w == 3,
n = n + 1;
m = (3*(n - 1));
record[m + 5] = t;
record[m + 6] = w;
record[m + 7] =  $\phi$ ;
];
If[t  $\neq$  w && t == 3 && w == 1,
n = n + 1;
n = n + 1;
m = (3*(n - 1));
record[m + 5] = t;
record[m + 6] = w;
record[m + 7] =  $\phi$ ;
];
t = w;
Null, { $\phi$ , 0.226, 0.5, 0.001}}
Do[
If[ $\mu$ gtot <  $\mu$ dtot &&  $\mu$ gtot <  $\mu$ ptot, w = 1];
If[ $\mu$ ptot <  $\mu$ gtot &&  $\mu$ ptot <  $\mu$ dtot, w = 2];
If[ $\mu$ dtot <  $\mu$ gtot &&  $\mu$ dtot <  $\mu$ ptot, w = 3];
If[t  $\neq$  w && t == 1 && w == 2,
n = n + 1;
m = (3*(n - 1));
```

```
record[m + 5] = t;
record[m + 6] = w;
record[m + 7] =  $\phi$ ;
];
If[t  $\neq$  w && t == 2 && w == 1,
n = n + 1;
m = (3*(n - 1));
record[m + 5] = t;
record[m + 6] = w;
record[m + 7] =  $\phi$ ;
];
If[t  $\neq$  w && t == 1 && w == 3,
n = n + 1;
m = (3*(n - 1));
record[m + 5] = t;
record[m + 6] = w;
record[m + 7] =  $\phi$ ;
];
If[t  $\neq$  w && t == 3 && w == 1,
n = n + 1;
m = (3*(n - 1));
record[m + 5] = t;
record[m + 6] = w;
record[m + 7] =  $\phi$ ;
];
If[t  $\neq$  w && t == 2 && w == 3,
n = n + 1;
m = (3*(n - 1));
record[m + 5] = t;
record[m + 6] = w;
record[m + 7] =  $\phi$ ;
];
If[t  $\neq$  w && t == 3 && w == 2,
n = n + 1;
m = (3*(n - 1));
record[m + 5] = t;
record[m + 6] = w;
record[m + 7] =  $\phi$ ;
];
t = w;
Null, { $\phi$ , 0.5, 0.999, 0.001}
j = 0;
Do[
phaserec[i] = 1;
Null, {i, 3, (2 n) + 2}];
Do[
m = (3*(i - 1));
If[record[m + 5] == 1 && record[m + 6] == 3 && record[m + 7] < phaserec[2],
gtod = FindRoot[{diffgc == diffdb, yintg == yintd}, {c, record[m + 7] - 0.05, 0.112, 1}, {b, record[m + 7]
+ 0.05, 0.226, 1}, MaxIterations -> 200];
```

```
gtodboundl = c /. gtod[[1]];
gtodboundr = b /. gtod[[2]];
ygtodboundl =  $\gamma\mu$ gtot /. c -> gtodboundl;
ygtodboundr =  $\gamma\mu$ dtot /. b -> gtodboundr;
slopegtod = (ygtodboundr - ygtodboundl)/(gtodboundr - gtodboundl);
If[record[m + 5] == 1 && record[m + 6] == 3 && record[m + 8] == 3 && record[m + 9] == 2 &&
record[m + 10] < phaserec[2],
gtopsec = FindRoot[{diffpal == diffgc, yintp == yintg}, {c, record[m + 7], 0.112, 1}, {al, record[m + 10],
0.5, 1}, MaxIterations -> 200];
gtopsecboundl = c /. gtopsec[[1]];
gtopsecboundr = al /. gtopsec[[2]];
If[gtopsecboundl > 0.112 && gtopsecboundl < 1 && gtopsecboundr > 0.5 && gtopsecboundr < 1,
ygtopsecboundl =  $\gamma\mu$ gtot /. c -> gtopsecboundl;
ygtopsecboundr =  $\gamma\mu$ ptot /. al -> gtopsecboundr;
slopegtopsec = (ygtopsecboundr - ygtopsecboundl)/(gtopsecboundr - gtopsecboundl);
If[slopegtopsec < slopegtod,
j = j + 1;
phaserec[(2 (j - 1)) + 3] = gtopsecboundl;
phaserec[(2 (j - 1)) + 4] = gtopsecboundr;
];
];
];
If[record[m + 5] == 1 && record[m + 6] == 3 && record[m + 2] == 2 && record[m + 3] == 1 &&
record[m + 6] < phaserec[2] && phaserec[(2 (j - 1)) + 3] == ptodsecboundl,
j = j + 1;
phaserec[(2 (j - 1)) + 3] = ptodsecboundl;
phaserec[(2 (j - 1)) + 4] = ptodsecboundr;
];
If[ygtodboundl > ygtodboundr && phaserec[(2 (j - 1)) + 3]  $\neq$  gtopsecboundl && phaserec[(2 (j - 1)) +
3]  $\neq$  ptodsecboundl,
j = j + 1;
phaserec[(2 (j - 1)) + 3] = gtodboundl;
phaserec[(2 (j - 1)) + 4] = gtodboundr;
];
];
If[record[m + 5] == 3 && record[m + 6] == 1 && record[m + 7] < phaserec[2],
dtog = FindRoot[{diffdb == diffpal, yintd == yintp}, {b, record[m + 7] - 0.05, 0.226, 1}, {c, record[m + 7]
+ 0.05, 0.112, 1}, MaxIterations -> 200];
dtogboundl = b /. dtog[[1]];
dtogboundr = c /. dtog[[2]];
ydtogboundl =  $\gamma\mu$ dtot /. b -> dtogboundl;
ydtogboundr =  $\gamma\mu$ gtot /. c -> dtogboundr;
slopedtog = (ydtogboundr - ydtogboundl)/(dtogboundr - dtogboundl);
If[record[m + 5] == 3 && record[m + 6] == 1 && record[m + 8] == 1 && record[m + 9] == 2 &&
record[m + 10] < phaserec[2],
dtopsec = FindRoot[{diffdb == diffpal, yintd == yintp}, {b, record[m + 7], 0.226, 1}, {al, record[m + 10],
0.5, 1}, MaxIterations -> 200];
dtopsecboundl = b /. dtopsec[[1]];
dtopsecboundr = al /. dtopsec[[2]];
If[dtopsecboundl > 0.226 && dtopsecboundl < 1 && dtopsecboundr > 0.5 && dtopsecboundr < 1,
```

```

ydtopsecboundl =  $\gamma\mu dtot / . b \rightarrow dtopsecboundl$ ;
ydtopsecboundr =  $\gamma\mu ptot / . al \rightarrow dtopsecboundr$ ;
slopedtopsec = (ydtopsecboundr - ydtopsecboundl)/(dtopsecboundr - dtopsecboundl);
If[slopedtopsec < slopedtog,
j = j + 1;
phaserec[(2 (j - 1)) + 3] = dtopsecboundl;
phaserec[(2 (j - 1)) + 4] = dtopsecboundr;
];
];
];
If[record[m + 5] == 3 && record[m + 6] == 1 && record[m + 2] == 2 && record[m + 3] == 3 &&
record[m + 6] < phaserec[2] && phaserec[(2 (j - 1)) + 3] == ptogsecboundl,
j = j + 1;
phaserec[(2 (j - 1)) + 3] = ptogsecboundl;
phaserec[(2 (j - 1)) + 4] = ptogsecboundr;
];
If[ydtogboundl > ydtogboundr && phaserec[(2 (j - 1)) + 3]  $\neq$  dtopsecboundl && phaserec[(2 (j - 1)) +
3]  $\neq$  ptogsecboundl,
j = j + 1;
phaserec[(2 (j - 1)) + 3] = dtogboundl;
phaserec[(2 (j - 1)) + 4] = dtogboundr;
];
];
If[record[m + 5] == 1 && record[m + 6] == 2 && record[m + 7] < phaserec[2],
gtop = FindRoot[{diffpal == diffgc, yintp == yintg}, {c, record[m + 7] - 0.05, 0.112, 1}, {al, record[m +
7] + 0.05, 0.5, 1}, MaxIterations -> 200];
gtopboundl = c /. gtop[[1]];
gtopboundr = al /. gtop[[2]];
ygtopboundl =  $\gamma\mu gtot / . c \rightarrow gtopboundl$ ;
ygtopboundr =  $\gamma\mu ptot / . al \rightarrow gtopboundr$ ;
slopegtop = (ygtopboundr - ygtopboundl)/(gtopboundr - gtopboundl);
If[record[m + 5] == 1 && record[m + 6] == 2 && record[m + 8] == 2 && record[m + 9] == 3 &&
record[m + 10] < phaserec[2],
gtodsec = FindRoot[{diffgc == diffdb, yintg == yintd}, {c, record[m + 7], 0.112, 1}, {b, record[m + 10],
0.226, 1}, MaxIterations -> 200];
gtodsecboundl = c /. gtodsec[[1]];
gtodsecboundr = b /. gtodsec[[2]];
If[gtodsecboundl > 0.112 && gtodsecboundl < 1 && gtodsecboundr > 0.226 && gtodsecboundr < 1,
ygtodsecboundl =  $\gamma\mu gtot / . c \rightarrow gtodsecboundl$ ;
ygtodsecboundr =  $\gamma\mu dtot / . b \rightarrow gtodsecboundr$ ;
slopegtodsec = (ygtodsecboundr - ygtodsecboundl)/(gtodsecboundr - gtodsecboundl);
If[slopegtodsec < slopegtog,
j = j + 1;
phaserec[(2 (j - 1)) + 3] = gtodsecboundl;
phaserec[(2 (j - 1)) + 4] = gtodsecboundr;
];
];
];
If[record[m + 5] == 1 && record[m + 6] == 2 && record[m + 2] == 3 && record[m + 3] == 1 &&
record[m + 6] < phaserec[2] && phaserec[(2 (j - 1)) + 3] == dtopsecboundl,

```

```
j = j + 1;
phaserec[(2 (j - 1)) + 3] = dtopsecboundl;
phaserec[(2 (j - 1)) + 4] = dtopsecboundr;
];
If[ygtopboundl > ygtopboundr && phaserec[(2 (j - 1)) + 3] ≠ gtodsecboundl && phaserec[(2 (j - 1)) +
3] ≠ dtopsecboundl,
j = j + 1;
phaserec[(2 (j - 1)) + 3] = gtopboundl;
phaserec[(2 (j - 1)) + 4] = gtopboundr;
];
];
If[record[m + 5] == 2 && record[m + 6] == 1 && record[m + 7] < phaserec[2],
ptog = FindRoot[{diffpal == diffgc, yintp == yintg}, {al, record[m + 7] - 0.05, 0.5, 1}, {c, record[m + 7] +
0.05, 0.112, 1}, MaxIterations -> 200];
ptogboundl = al /. ptog[[1]];
ptogboundr = c /. ptog[[2]];
yptogboundl =  $\gamma \mu$ ptot /. al -> ptogboundl;
yptogboundr =  $\gamma \mu$ gtot /. c -> ptogboundr;
slopeptog = (yptogboundr - yptogboundl)/(ptogboundr - ptogboundl);
If[record[m + 5] == 2 && record[m + 6] == 1 && record[m + 8] == 1 && record[m + 9] == 3 &&
record[m + 10] < phaserec[2],
ptodsec = FindRoot[{diffdb == diffpal, yintd == yintp}, {al, record[m + 7], 0.5, 1}, {b, record[m + 10], -
0.226, 1}, MaxIterations -> 200];
ptodsecboundl = al /. ptodsec[[1]];
ptodsecboundr = b /. ptodsec[[2]];
If[ptodsecboundl > 0.5 && ptodsecboundl < 1 && ptodsecboundr > 0.226 && ptodsecboundr < 1,
yptodsecboundl =  $\gamma \mu$ ptot /. al -> ptodsecboundl;
yptodsecboundr =  $\gamma \mu$ dtot /. b -> ptodsecboundr;
slopeptodsec = (yptodsecboundr - yptodsecboundl)/(ptodsecboundr - ptodsecboundl);
If[slopeptodsec < slopeptog,
j = j + 1;
phaserec[(2 (j - 1)) + 3] = ptodsecboundl;
phaserec[(2 (j - 1)) + 4] = ptodsecboundr;
];
];
];
If[record[m + 5] == 2 && record[m + 6] == 1 && record[m + 2] == 3 && record[m + 3] == 2 &&
record[m + 6] < phaserec[2] && phaserec[(2 (j - 1)) + 3] == dtogsecboundl,
j = j + 1;
phaserec[(2 (j - 1)) + 3] = dtogsecboundl;
phaserec[(2 (j - 1)) + 4] = dtogsecboundr;
];
];
If[yptogboundl > yptogboundr && phaserec[(2 (j - 1)) + 3] ≠ ptodsecboundl && phaserec[(2 (j - 1)) +
3] ≠ dtogsecboundl,
j = j + 1;
phaserec[(2 (j - 1)) + 3] = ptogboundl;
phaserec[(2 (j - 1)) + 4] = ptogboundr;
];
];
```

```

If[record[m + 5] == 3 && record[m + 6] == 2 && record[m + 7] < phaserec[2],
dtop = FindRoot[{diffdb == diffpal, yintd == yintp}, {b, record[m + 7] - 0.05, 0.226, 1}, {a1, record[m +
7] + 0.05, 0.5, 1}, MaxIterations -> 200];
dtopboundl = b /. dtop[[1]];
dtopboundr = a1 /. dtop[[2]];
ydtotboundl =  $\gamma \mu dtot$  /. b -> dtopboundl;
ydtotboundr =  $\gamma \mu ptot$  /. a1 -> dtopboundr;
slopedtop = (ydtotboundr - ydtotboundl)/(dtopboundr - dtopboundl);
If[record[m + 5] == 3 && record[m + 6] == 2 && record[m + 8] == 2 && record[m + 9] == 1 &&
record[m + 10] < phaserec[2],
dtogsec = FindRoot[{diffgc == diffdb, yintg == yintd}, {b, record[m + 7], 0.226, 1}, {c, record[m + 10],
0.112, 1}, MaxIterations -> 200];
dtogsecboundl = b /. dtogsec[[1]];
dtogsecboundr = c /. dtogsec[[2]];
If[dtogsecboundl > 0.226 && dtogsecboundl < 1 && dtogsecboundr > 0.112 && dtogsecboundr < 1,
ydtogsecboundl =  $\gamma \mu dtot$  /. b -> dtogsecboundl;
ydtogsecboundr =  $\gamma \mu gtot$  /. c -> dtogsecboundr;
slopedtogsec = (ydtogsecboundr - ydtogsecboundl)/(dtogsecboundr - dtogsecboundl);
If[slopedtogsec < slopedtop,
j = j + 1;
phaserec[(2 (j - 1)) + 3] = dtogsecboundl;
phaserec[(2 (j - 1)) + 4] = dtogsecboundr;
];
];
];
If[record[m + 5] == 3 && record[m + 6] == 2 && record[m + 2] == 1 && record[m + 3] == 3 &&
record[m + 6] < phaserec[2] && phaserec[(2 (j - 1)) + 3] == gtopsecboundl,
j = j + 1;
phaserec[(2 (j - 1)) + 3] = gtopsecboundl;
phaserec[(2 (j - 1)) + 4] = gtopsecboundr;
];
If[ydtopboundl > ydtopboundr && phaserec[(2 (j - 1)) + 3]  $\neq$  dtogsecboundl && phaserec[(2 (j - 1)) +
3]  $\neq$  gtopsecboundl,
j = j + 1;
phaserec[(2 (j - 1)) + 3] = dtopboundl;
phaserec[(2 (j - 1)) + 4] = dtopboundr;
];
];
If[record[m + 5] == 2 && record[m + 6] == 3 && record[m + 7] < phaserec[2],
ptod = FindRoot[{diffdb == diffpal, yintd == yintp}, {a1, record[m + 7] - 0.05, 0.5, 1}, {b, record[m + 7]
+ 0.05, 0.226, 1}, MaxIterations -> 200];
ptodboundl = a1 /. ptod[[1]];
ptodboundr = b /. ptod[[2]];
yptodboundl =  $\gamma \mu ptot$  /. a1 -> ptodboundl;
yptodboundr =  $\gamma \mu dtot$  /. b -> ptodboundr;
slopeptod = (yptodboundr - yptodboundl)/(ptodboundr - ptodboundl);
If[record[m + 5] == 2 && record[m + 6] == 3 && record[m + 8] == 3 && record[m + 9] == 1 &&
record[m + 10] < phaserec[2],
ptogsec = FindRoot[{diffpal == diffgc, yintp == yintg}, {a1, record[m + 7], 0.5, 1}, {c, record[m + 10],
0.112, 1}, MaxIterations -> 200];

```

```

ptogsecboundl = a1 /. ptogsec[[1]];
ptogsecboundr = c /. ptogsec[[2]];
If[ptogsecboundl > 0.5 && ptogsecboundl < 1 && ptogsecboundr > 0.112 && ptogsecboundr < 1,
yptogsecboundl =  $\gamma\mu_{ptot}$  /. a1 -> ptogsecboundl;
yptogsecboundr =  $\gamma\mu_{gtot}$  /. c -> ptogsecboundr;
slopeptogsec = (yptogsecboundr - yptogsecboundl)/(ptogsecboundr - ptogsecboundl);
If[slopeptogsec < slopeptod,
j = j + 1;
phaserec[(2 (j - 1)) + 3] = ptogsecboundl;
phaserec[(2 (j - 1)) + 4] = ptogsecboundr;
];
];
];
If[record[m + 5] == 2 && record[m + 6] == 3 && record[m + 2] == 1 && record[m + 3] == 2 &&
record[m + 6] < phaserec[2] && phaserec[(2 (j - 1)) + 3] == gtodsecboundl,
j = j + 1;
phaserec[(2 (j - 1)) + 3] = gtodsecboundl;
phaserec[(2 (j - 1)) + 4] = gtodsecboundr;
];
If[yptodboundl > yptodboundr && phaserec[(2 (j - 1)) + 3]  $\neq$  ptogsecboundl && phaserec[(2 (j - 1)) +
3]  $\neq$  gtodsecboundl,
j = j + 1;
phaserec[(2 (j - 1)) + 3] = ptodboundl;
phaserec[(2 (j - 1)) + 4] = ptodboundr;
];
];
Null, {i, 1, n}
Do[
If[phaserec[i] > phaserec[2],
phaserec[i] = 1];
Null, {i, 3, (2 (j - 1)) + 4}];
Do[
Write[phasematrix, phaserec[i], " ", phaserec[1]];
Null, {i, 2, (2 (j - 1)) + 4}];
totalst = ToString[phaserec[1]];
Do[
stpart = ToString[phaserec[i]];
totalst = StringJoin[totalst, " ", stpart];
Null, {i, 2, (2 (j - 1)) + 4}];
Write[yphasematrix, totalst];
Null, {k, 0, 31, 0.5}
Close[phasematrix];
Close[yphasematrix];
phasedata = Import["C:\phasematrix_t", "Table"];
phaseplot = ListPlot[phasedata, DefaultFont -> {"Times", 8}, FrameLabel -> {" $\phi_w$ ", " $\Delta T / ^\circ C$ "},
FrameStyle -> AbsoluteThickness[0.5], DisplayFunction -> $DisplayFunction, Frame -> True,
PlotRange -> {{0, 0.995}, {0, 30}}, AxesOrigin -> {0, 0}];
Null

```
